# Supplementary material
Source: Research Square preprint supplement (doi:10.21203/rs.3.rs-8730453/v1)
Supplement: Supplementary file 1 [file d132aae4ea6f9bf930b30394.docx]

Table 1. Baseline Characteristics of the Study Population (N = 203)

| Characteristic | Value |
| --- | --- |
| Number of patients, n | 203 |
| Age, mean ± SD (years) | 52.2 ± 15.4 |
| Sex |  |
| Male, n (%) | 112 (55.2%) |
| Female, n (%) | 91 (44.8%) |
| Height, mean ± SD (cm) | 165.2 ± 8.23 |
| Weight, mean ± SD (kg) | 64.24 ± 11.69 |
| BMI, mean ± SD (kg/m²) | 23.47 ± 3.45 |
| Primary surgical indications | Carpal tunnel syndrome; palmar fascial contracture; digital nerve tumor; tendon injury; trauma-related soft-tissue conditions |

Table 2. Perioperative Blood Pressure Metrics (N = 203)

| Stage | SBP Mean (mmHg) | DBP Mean (mmHg) | Interpretation |
| --- | --- | --- | --- |
| Admission | 129.3 | 75.5 | Baseline hemodynamics |
| Pre-surgery | 134.0 | 72.4 | Mild anticipatory sympathetic rise |
| Intraoperative | 127.4 | 70.2 | Expected anesthetic-mediated reduction |
| Postoperative | 129.5 | 69.9 | Corrected DBP; stable recovery to baseline |

Table 3. Perioperative Hemodynamic Stability Analysis (N = 203)

| Comparison | ΔSBP (mmHg) | ΔDBP (mmHg) | Interpretation |
| --- | --- | --- | --- |
| Pre-surgery vs. Admission | +4.70 | –3.10 | Mild sympathetic rise in systolic pressure before surgery, accompanied by a small DBP decrease. |
| Intraoperative vs. Pre-surgery | –6.60 | –2.20 | Expected anesthesia-associated reduction in both SBP and DBP. |
| Intraoperative vs. Admission | –1.90 | –5.30 | SBP remains broadly stable relative to baseline; DBP shows a moderate anesthetic-related decline. |
| Postoperative vs. Intraoperative | +2.10 | –0.30 | Mild recovery in SBP; DBP remains essentially unchanged. |
| Postoperative vs. Admission | +0.20 | –5.60 | SBP returns to baseline; DBP remains slightly lower than admission values. |
